# Supplementary material for: EDIII-Fc induces protective immune responses against the Zika virus in mice and rhesus macaque
Source: PubMed Central journal article supplement (PMC10695381; doi:10.1371/journal.pntd.0011770), 2023-11-20
Supplement: pntd.0011770.s001.pdf [file pntd.0011770.s001.pdf]

| SBI Multiple Sequence Alignment Viewer, Version 1.21.0 |       |                                      |     |          |            |                  |             |               |          |          |            |   |
|--------------------------------------------------------|-------|--------------------------------------|-----|----------|------------|------------------|-------------|---------------|----------|----------|------------|---|
| Sequence ID                                            | Start | Alignment                            | End | Organism | Date       | Host             | Source      | Gene          | Identity | Coverage | Mismatches |   |
|                                                        |       | 1 10 20 30 40 50 60 70 80 90 100 109 |     |          |            |                  |             |               |          |          |            |   |
| Query_2501                                             | (+)   | 1                                    |     | 109      |            |                  |             |               | 100.00   | 100.00   | 0          |   |
| QDP14363.1                                             | (+)   | 63                                   |     | 171      | Zika virus | 07-Mar-...       | Aedes sp.   |               | 100.00   | 100.00   | 0          |   |
| 5KVD_E                                                 | (+)   | 2                                    |     | 110      | Zika virus |                  |             |               | 100.00   | 100.00   | 0          |   |
| 5OMZ_A                                                 | (+)   | 5                                    |     | 113      | Zika virus |                  |             |               | 100.00   | 100.00   | 0          |   |
| QDP14362.1                                             | (+)   | 64                                   |     | 172      | Zika virus | 07-Mar-...       | Aedes sp.   |               | 100.00   | 100.00   | 0          |   |
| QDP14366.1                                             | (+)   | 64                                   |     | 172      | Zika virus | 07-Mar-...       | Aedes sp.   |               | 100.00   | 100.00   | 0          |   |
| QDP14367.1                                             | (+)   | 64                                   |     | 172      | Zika virus | 07-Mar-...       | Aedes sp.   |               | 100.00   | 100.00   | 0          |   |
| 5GZN_A                                                 | (+)   | 299                                  |     | 407      | Zika virus |                  |             |               | 100.00   | 100.00   | 0          |   |
| 5JHL_A                                                 | (+)   | 300                                  |     | 408      | Zika virus |                  |             |               | 100.00   | 100.00   | 0          |   |
| 7BQ5_A                                                 | (+)   | 299                                  |     | 407      | Zika virus |                  |             |               | 100.00   | 100.00   | 0          |   |
| 7BPK_A                                                 | (+)   | 300                                  |     | 408      | Zika virus |                  |             |               | 100.00   | 100.00   | 0          |   |
| APO40589.1                                             | (+)   | 284                                  |     | 392      | Zika virus | Jan-2016         | Aedes a...  |               | 100.00   | 100.00   | 0          |   |
| AVK43536.1                                             | (+)   | 299                                  |     | 407      | Zika virus | Jan-2016         | Homo s...   |               | 100.00   | 100.00   | 0          |   |
| AWW21438.1                                             | (+)   | 288                                  |     | 396      | Zika virus | 10-Nov-...       | Homo s...   |               | 100.00   | 100.00   | 0          |   |
| AWW21435.1                                             | (+)   | 288                                  |     | 396      | Zika virus | 10-Nov-...       | Homo s...   |               | 100.00   | 100.00   | 0          |   |
| AZS35397.1                                             | (+)   | 285                                  |     | 393      | Zika virus | 2017             | Homo s...   | serum         | 100.00   | 100.00   | 0          |   |
| AZS35400.1                                             | (+)   | 285                                  |     | 393      | Zika virus | 2017             | Homo s...   | serum         | 100.00   | 100.00   | 0          |   |
| AWW21437.1                                             | (+)   | 288                                  |     | 396      | Zika virus | 10-Nov-...       | Homo s...   |               | 100.00   | 100.00   | 0          |   |
| AWW21434.1                                             | (+)   | 288                                  |     | 396      | Zika virus | 10-Nov-...       | Homo s...   |               | 100.00   | 100.00   | 0          |   |
| AZS35396.1                                             | (+)   | 290                                  |     | 398      | Zika virus | 2017             | Homo s...   | serum         | 100.00   | 100.00   | 0          |   |
| ASN64426.1                                             | (+)   | 291                                  |     | 399      | Zika virus | Jan-2013         | Homo s...   | plasma        | 100.00   | 100.00   | 0          |   |
| AQQ13230.1                                             | (+)   | 1                                    |     | 105      | Zika virus | 24-Feb-...       | Homo s...   |               | 99.05    | 96.33    | 1          |   |
| ASN64427.1                                             | (+)   | 299                                  |     | 407      | Zika virus | Jun-2013         | Homo s...   | plasma        | 100.00   | 100.00   | 0          |   |
| ANF28857.1                                             | (+)   | 299                                  |     | 407      | Zika virus | 2015             | Homo s...   |               | 100.00   | 100.00   | 0          |   |
| YP_009430300.1                                         | (+)   | 299                                  |     | 407      | Zika virus | 2015             | Homo s...   | fetus' bra... | POLY     | 100.00   | 100.00     | 0 |
| ARO85704.1                                             | (+)   | 299                                  |     | 407      | Zika virus | 10-Oct-2...      | Homo s...   | culture       | 100.00   | 100.00   | 0          |   |
| AWW21436.1                                             | (+)   | 288                                  |     | 396      | Zika virus | 10-Nov-...       | Homo s...   |               | 100.00   | 100.00   | 0          |   |
| QCQ29072.1                                             | (+)   | 300                                  |     | 408      | Zika virus | 25-Sep-...       | Aedes a...  |               | 100.00   | 100.00   | 0          |   |
| 6JFH_A                                                 | (+)   | 299                                  |     | 407      | Zika virus |                  |             |               | 100.00   | 100.00   | 0          |   |
| ATS91863.1                                             | (+)   | 299                                  |     | 407      | Zika virus | 11-Jul-2...      | Homo s...   | saliva        | 100.00   | 100.00   | 0          |   |
| 5LBS_A                                                 | (+)   | 299                                  |     | 407      | Zika virus |                  |             |               | 100.00   | 100.00   | 0          |   |
| AQQ13229.1                                             | (+)   | 1                                    |     | 105      | Zika virus | 19-Feb-...       | Homo s...   |               | 99.05    | 96.33    | 1          |   |
| AOT82811.1                                             | (+)   | 304                                  |     | 412      | Zika virus | 16-May-...       | Homo s...   | serum         | 100.00   | 100.00   | 0          |   |
| ANF28861.1                                             | (+)   | 299                                  |     | 407      | Zika virus | 2016             | Homo s...   |               | 100.00   | 100.00   | 0          |   |
| ANF28862.1                                             | (+)   | 299                                  |     | 407      | Zika virus | 2016             | Homo s...   |               | 100.00   | 100.00   | 0          |   |
| ARO85706.1                                             | (+)   | 299                                  |     | 407      | Zika virus | 05-Mar-...       | Homo s...   | culture       | 100.00   | 100.00   | 0          |   |
| ANK57898.1                                             | (+)   | 299                                  |     | 407      | Zika virus | 2016             | Homo s...   |               | 100.00   | 100.00   | 0          |   |
| AWW21433.1                                             | (+)   | 288                                  |     | 396      | Zika virus | 10-Nov-...       | Homo s...   |               | 99.08    | 100.00   | 1          |   |
| AVV61952.1                                             | (+)   | 297                                  |     | 405      | Zika virus | 16-Apr-2...      | Homo s...   |               | 100.00   | 100.00   | 0          |   |
| AWW21432.1                                             | (+)   | 288                                  |     | 396      | Zika virus | 10-Nov-...       | Homo s...   |               | 99.08    | 100.00   | 1          |   |
| AWW21431.1                                             | (+)   | 288                                  |     | 396      | Zika virus | 10-Nov-...       | Homo s...   |               | 99.08    | 100.00   | 1          |   |
| AZS35398.1                                             | (+)   | 285                                  |     | 393      | Zika virus | 2017             | Homo s...   | serum         | 99.08    | 100.00   | 1          |   |
| AQU11806.1                                             | (+)   | 249                                  |     | 357      | Zika virus | 1989             | mosquito    |               | 98.17    | 100.00   | 2          |   |
| AZS35402.1                                             | (+)   | 285                                  |     | 393      | Zika virus | 2017             | Homo s...   | serum         | 99.08    | 100.00   | 1          |   |
| AVV61891.1                                             | (+)   | 299                                  |     | 407      | Zika virus | 28-Feb-...       | Homo s...   | saliva        | 99.08    | 100.00   | 1          |   |
| ATW74960.1                                             | (+)   | 299                                  |     | 407      | Zika virus | 11-Aug-...       | Homo s...   | serum         | 99.08    | 100.00   | 1          |   |
| QCH40598.1                                             | (+)   | 289                                  |     | 397      | Zika virus | 2018-06          | Anophel...  |               | 98.17    | 100.00   | 2          |   |
| QCH40599.1                                             | (+)   | 289                                  |     | 397      | Zika virus | 2018-06          | Anophel...  |               | 98.17    | 100.00   | 2          |   |
| 6NIP_E                                                 | (+)   | 299                                  |     | 405      | Zika virus | ZIKV/H. sapie... |             |               | 100.00   | 98.17    | 0          |   |
| ALX35662.1                                             | (+)   | 303                                  |     | 411      | Zika virus | Oct-2015         | Homo s...   | serum         | 100.00   | 100.00   | 0          |   |
| 7JYI_C                                                 | (+)   | 299                                  |     | 407      | Zika virus |                  |             |               | 97.25    | 100.00   | 3          |   |
| ATW74961.1                                             | (+)   | 299                                  |     | 407      | Zika virus | 27-Jun-2...      | Homo s...   | serum         | 98.17    | 100.00   | 2          |   |
| 6JEP_E                                                 | (+)   | 1                                    |     | 101      | Zika virus |                  |             |               | 100.00   | 92.66    | 0          |   |
| ATS91865.1                                             | (+)   | 299                                  |     | 407      | Zika virus | 26-May-...       | Homo s...   | serum         | 99.08    | 100.00   | 1          |   |
| AOX24134.1                                             | (+)   | 389                                  |     | 497      | Zika virus | 01-Sep-...       | Homo s...   | urine         | 99.08    | 100.00   | 1          |   |
| AXE75585.1                                             | (+)   | 299                                  |     | 407      | Zika virus | 21-Oct-2...      | Homo s...   |               | 98.17    | 100.00   | 2          |   |
| AOX24135.1                                             | (+)   | 491                                  |     | 599      | Zika virus | 30-Aug-...       | Homo s...   | urine         | 100.00   | 100.00   | 0          |   |
| YP_009227198.1                                         | (+)   | 295                                  |     | 403      | Zika virus |                  | sentinel... |               | POLY     | 96.33    | 100.00     | 4 |
| ASV60828.1                                             | (+)   | 299                                  |     | 407      | Zika virus | 11-Nov-...       | Homo s...   |               | 96.33    | 100.00   | 4          |   |
| ASV60826.1                                             | (+)   | 299                                  |     | 407      | Zika virus | 05-Jul-2...      | Homo s...   |               | 96.33    | 100.00   | 4          |   |
| 5H32_A                                                 | (+)   | 299                                  |     | 403      | Zika virus |                  |             |               | 100.00   | 96.33    | 0          |   |
| QGW51946.1                                             | (+)   | 589                                  |     | 697      | Zika virus | Dec-2015         | Homo s...   |               | 100.00   | 100.00   | 0          |   |
| APG56497.1                                             | (+)   | 589                                  |     | 697      | Zika virus | Oct-2016         | Homo s...   |               | 100.00   | 100.00   | 0          |   |
| APG56494.1                                             | (+)   | 589                                  |     | 697      | Zika virus | Aug-2016         | Homo s...   |               | 100.00   | 100.00   | 0          |   |
| ASV60827.1                                             | (+)   | 299                                  |     | 407      | Zika virus | 10-Jul-2...      | Homo s...   |               | 96.33    | 100.00   | 4          |   |
| APG56493.1                                             | (+)   | 589                                  |     | 697      | Zika virus | Jun-2016         | Homo s...   |               | 100.00   | 100.00   | 0          |   |
| QGW51952.1                                             | (+)   | 589                                  |     | 697      | Zika virus | 19-Feb-...       | Homo s...   |               | 100.00   | 100.00   | 0          |   |
| APG56495.1                                             | (+)   | 589                                  |     | 697      | Zika virus | Sep-2016         | Homo s...   |               | 100.00   | 100.00   | 0          |   |
| QGW51947.1                                             | (+)   | 589                                  |     | 697      | Zika virus | 2010             | Homo s...   |               | 100.00   | 100.00   | 0          |   |
| QGW51949.1                                             | (+)   | 589                                  |     | 697      | Zika virus | Dec-2015         | Homo s...   |               | 99.08    | 100.00   | 1          |   |
| APG56496.1                                             | (+)   | 589                                  |     | 697      | Zika virus | Oct-2016         | Homo s...   |               | 99.08    | 100.00   | 1          |   |
| QGW51945.1                                             | (+)   | 589                                  |     | 697      | Zika virus | 2013             | Homo s...   |               | 99.08    | 100.00   | 1          |   |
| AML81023.1                                             | (+)   | 589                                  |     | 697      | Zika virus | Jan-2016         | Homo s...   | serum         | 100.00   | 100.00   | 0          |   |
| AML81022.1                                             | (+)   | 589                                  |     | 697      | Zika virus | Dec-2015         | Homo s...   | serum         | 100.00   | 100.00   | 0          |   |
| ALX35660.1                                             | (+)   | 589                                  |     | 697      | Zika virus | Oct-2015         | Homo s...   | serum         | 100.00   | 100.00   | 0          |   |
| AML81021.1                                             | (+)   | 589                                  |     | 697      | Zika virus | Dec-2015         | Homo s...   | serum         | 100.00   | 100.00   | 0          |   |
| AML81026.1                                             | (+)   | 589                                  |     | 697      | Zika virus | Jan-2016         | Homo s...   | serum         | 100.00   | 100.00   | 0          |   |
| AML81025.1                                             | (+)   | 589                                  |     | 697      | Zika virus | Jan-2016         | Homo s...   | serum         | 100.00   | 100.00   | 0          |   |
| QGW51942.1                                             | (+)   | 589                                  |     | 697      | Zika virus | 17-Nov-...       | Homo s...   |               | 98.17    | 100.00   | 2          |   |
| AML81019.1                                             | (+)   | 589                                  |     | 697      | Zika virus | Jan-2016         | Homo s...   | urine         | 100.00   | 100.00   | 0          |   |
| AML81020.1                                             | (+)   | 589                                  |     | 697      | Zika virus | Jan-2016         | Homo s...   | serum         | 100.00   | 100.00   | 0          |   |
| AML81027.1                                             | (+)   | 589                                  |     | 697      | Zika virus | Dec-2015         | Homo s...   | serum         | 100.00   | 100.00   | 0          |   |
| AOX49268.1                                             | (+)   | 589                                  |     | 697      | Zika virus | Apr-2016         | Homo s...   | semen         | 100.00   | 100.00   | 0          |   |
| AOY10606.1                                             | (+)   | 589                                  |     | 697      | Zika virus | Apr-2016         | Homo s...   | saliva        | 100.00   | 100.00   | 0          |   |
| AMC37200.1                                             | (+)   | 299                                  |     | 407      | Zika virus | 10-Nov-...       | Homo s...   |               | 100.00   | 100.00   | 0          |   |
| AOX49267.1                                             | (+)   | 589                                  |     | 697      | Zika virus | Jun-2016         | Homo s...   | urine         | 100.00   | 100.00   | 0          |   |
| QUJ10646.1                                             | (+)   | 331                                  |     | 439      | Zika virus | 24-Jan-2...      | Homo s...   |               | 100.00   | 100.00   | 0          |   |
| AZS35391.1                                             | (+)   | 589                                  |     | 697      | Zika virus | 07-Apr-2...      | Homo s...   | urine         | 100.00   | 100.00   | 0          |   |
| ARB07955.1                                             | (+)   | 501                                  |     | 609      | Zika virus | 01-Aug-...       | Homo s...   | serum         | 100.00   | 100.00   | 0          |   |
| AXE75583.1                                             | (+)   | 299                                  |     | 407      | Zika virus | 01-Apr-2...      | Homo s...   |               | 96.33    | 100.00   | 4          |   |
| AZS35366.1                                             | (+)   | 589                                  |     | 697      | Zika virus | 10-Feb-...       | Homo s...   | serum         | 100.00   | 100.00   | 0          |   |
| AQS26817.1                                             | (+)   | 589                                  |     | 697      | Zika virus | 25-Apr-2...      | Homo s...   |               | 100.00   | 100.00   | 0          |   |
| AQS26830.1                                             | (+)   | 505                                  |     | 613      | Zika virus | Jan-2016         | Homo s...   |               | 100.00   | 100.00   | 0          |   |
| AZS35369.1                                             | (+)   | 589                                  |     | 697      | Zika virus | 20-Jan-2...      | Homo s...   | serum         | 100.00   | 100.00   | 0          |   |
| AZU90721.1                                             | (+)   | 589                                  |     | 697      | Zika virus | 05-Aug-...       | Homo s...   | urine         | 100.00   | 100.00   | 0          |   |
| AZS35340.1                                             | (+)   | 589                                  |     | 697      | Zika virus | 06-Apr-2...      | Homo s...   | saliva        | 100.00   | 100.00   | 0          |   |
| AZS35350.1                                             | (+)   | 589                                  |     | 697      | Zika virus | 15-Feb-...       | Homo s...   | plasma        | 100.00   | 100.00   | 0          |   |
| AQS26823.1                                             | (+)   | 589                                  |     | 697      | Zika virus | 13-Mar-...       | Homo s...   |               | 100.00   | 100.00   | 0          |   |
| AZS35385.1                                             | (+)   | 589                                  |     | 697      | Zika virus | 24-Mar-...       | Homo s...   | plasma        | 100.00   | 100.00   | 0          |   |
| AZS35368.1                                             | (+)   | 589                                  |     | 697      | Zika virus | 25-Jan-2...      | Homo s...   | urine         | 100.00   | 100.00   | 0          |   |
| AZS35373.1                                             | (+)   | 589                                  |     | 697      | Zika virus | 25-Jan-2...      | Homo s...   | serum         | 100.00   | 100.00   | 0          |   |
